# Supplementary material for: A silver electrode based surface acoustic wave (SAW) mercury vapor sensor: a physio-chemical and analytical investigation
Source: Royal Society of Chemistry journal article supplement (doi:10.1039/c6ra03148j), 2016-01-01
Supplement: c6ra03148j1.pdf [file c6ra03148j1.pdf]

## **Supporting Information**

# A silver electrode based surface acoustic wave (SAW) mercury vapor sensor: a physio-chemical and analytical investigation

*K M Mohibul Kabir<sup>1</sup>, Ylias M. Sabri<sup>1</sup>, Beбето Lay<sup>1</sup>, Samuel J. Ippolito<sup>1,2\*</sup> and Suresh K. Bhargava<sup>1\*</sup>*

<sup>1</sup>Centre for Advanced materials & Industrial chemistry (CAMIC), School of Applied Sciences, RMIT  
University, Melbourne, VIC 3001, Australia

<sup>2</sup>School of Electrical and Computer Engineering, RMIT University, Melbourne, VIC 3001, Australia

\*Corresponding Author: [samuel.ippolito@rmit.edu.au](mailto:samuel.ippolito@rmit.edu.au) (Phone: +61 3 9925 2673),

[suresh.bhargava@rmit.edu.au](mailto:suresh.bhargava@rmit.edu.au) (Phone: +61 3 9925 2330)

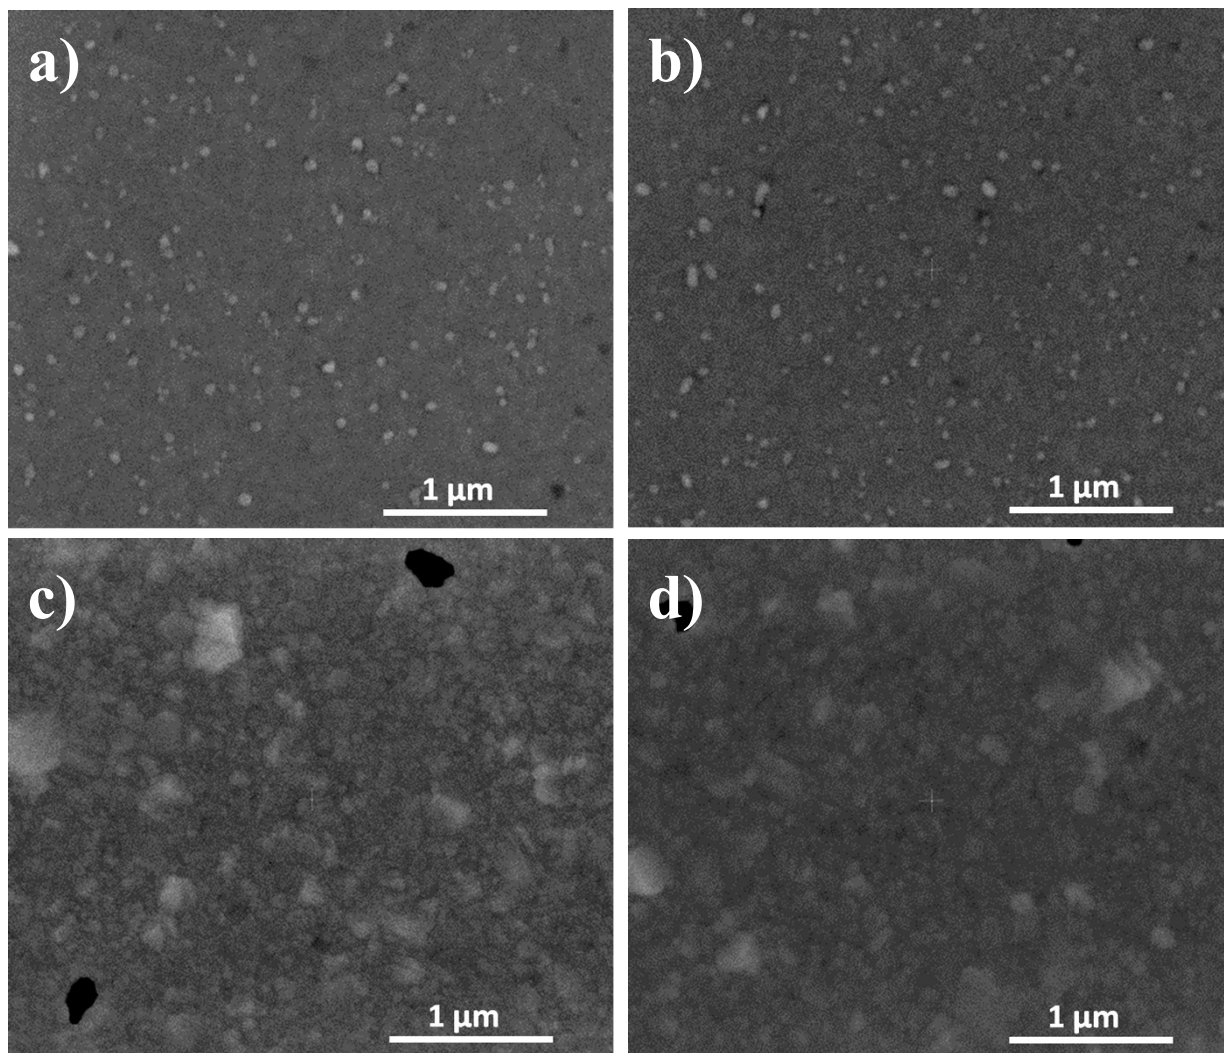

**Figure S1:** SEM images of the Ag-surface a, b) before and c, d) after three weeks Hg<sup>0</sup> vapor exposure period.

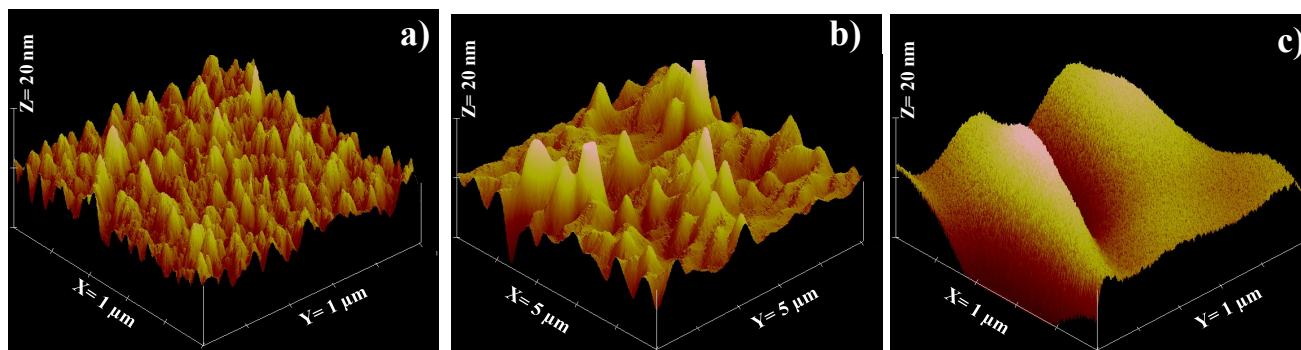

**Figure S2:** a) AFM image of the Ag surface before  $\text{Hg}^0$  vapor exposure tests with X, Y and Z scale size of 1  $\mu\text{m}$ , 1  $\mu\text{m}$  and 20 nm, respectively; and AFM images of the Ag surface after 3-week  $\text{Hg}^0$  vapor exposure tests with X, Y and Z scale size of b) 5  $\mu\text{m}$ , 5  $\mu\text{m}$  and 20 nm and c) 1  $\mu\text{m}$ , 1  $\mu\text{m}$  and 20 nm, respectively.

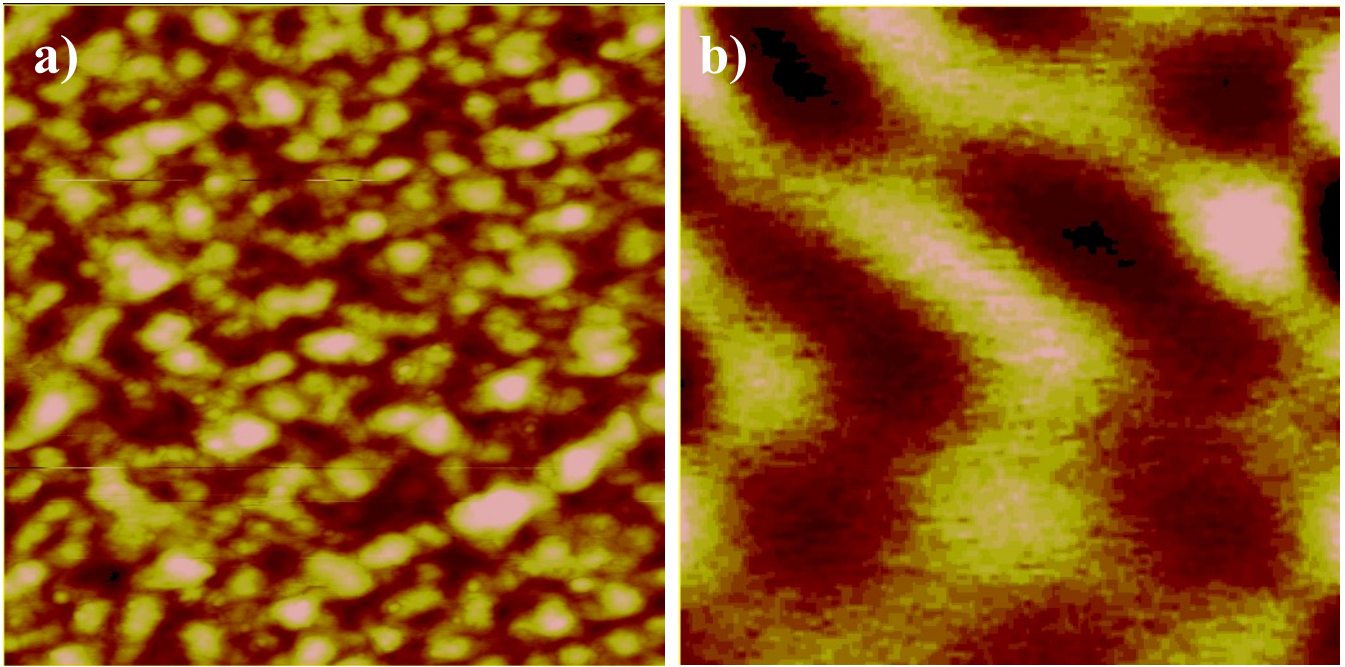

**Figure S3:** AFM images show the roughness of the Ag-surface a) before and b) after three weeks  $\text{Hg}^0$  vapor exposure period. Scan size is  $1 \times 1 \mu\text{m}$ .

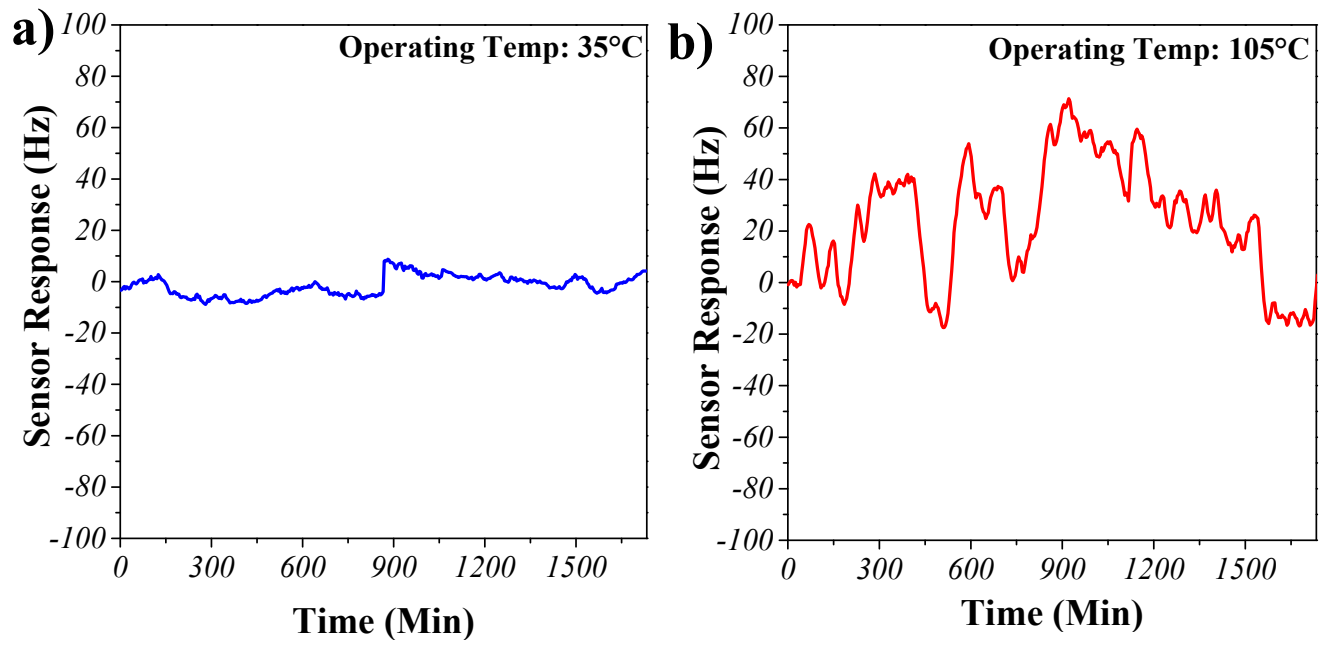

**Figure S4:** Noise profile of the developed SAW-based sensor while operating at a) 35°C and b) 105°C.

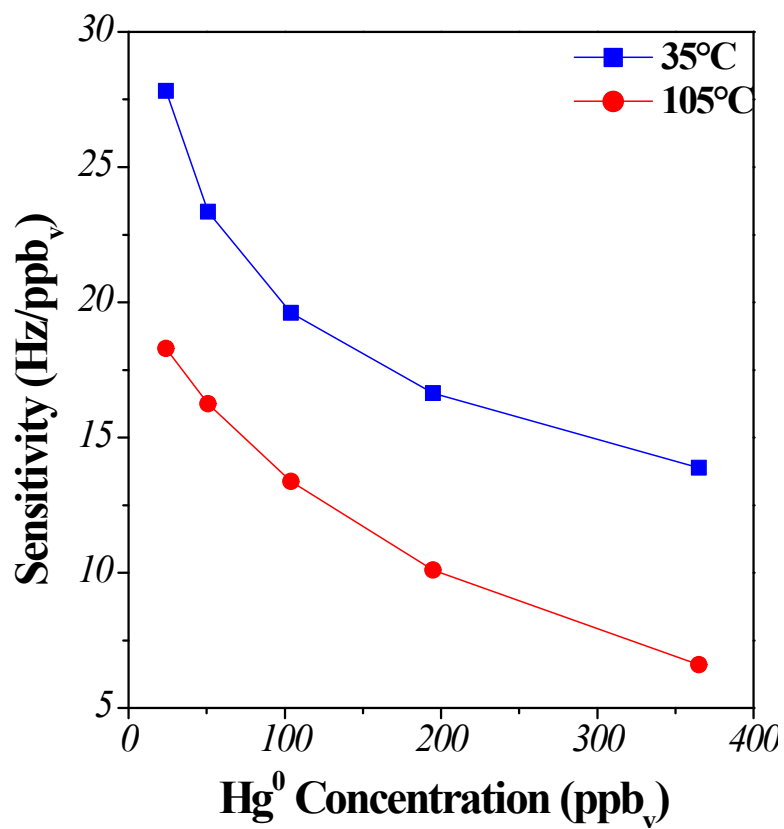

**Figure S5:** Sensitivity of the developed sensor toward 24-104 ppb<sub>v</sub> of Hg<sup>0</sup> vapor exposure at 35 and 105°C.
